# Supplementary material
Source: Springer Nature journal article supplement (https://www.springermedizin.de/resource/supplementary/13063_2013_1488_MOESM2_ESM.pdf/9620140)
Supplement: MOESM2 [file 9620140]

|                                     | Pre | 2/12 | 1 yr | 2 yr | 3 yr | 4 yr | 5 yr | 7 yr | 10 yr |
|-------------------------------------|-----|------|------|------|------|------|------|------|-------|
| OKS (self report function)          | ▲   | ○    | ○    | ○    | ○    | ○    | ○    | ○    | ○     |
| AKSS (clinical exam)                | ▲   | ▲    | ▲    |      |      |      | ▲    |      | ▲     |
| UCLA (self report activity)         | ▲   | ○    | ○    | ○    | ○    | ○    | ○    | ○    | ○     |
| High Activity Arthroplasty Score    | ▲   | ○    | ○    | ○    | ○    | ○    | ○    | ○    | ○     |
| X-rays                              | ▲   | ▲ *  |      |      |      |      | ▲    |      | ▲     |
| EQ-5D                               | ▲   | ○    | ○    | ○    | ○    | ○    | ○    | ○    | ○     |
| Lund (patient satisfaction)         |     | ○    | ○    | ○    | ○    | ○    | ○    | ○    | ○     |
| Complications                       |     | ▲    | ▲    | ○    | ○    | ○    | ▲    | ○    | ▲     |
| Healthcare and patient resource use | ▲   | ○    | ○    | ○    | ○    | ○    | ○    | ○    | ○     |

▲ = Clinical Assessments   ○ = Postal Questionnaires   \*=Immediately Post Op
